# Supplementary material for: Enhancing near-infrared II photothermal conversion through anchoring numerous nanospheres to the edge of a gold nanosheet
Source: Royal Society of Chemistry journal article supplement (doi:10.1039/d4tc03835e), 2024-01-01
Supplement: d4tc03835e1.pdf [file d4tc03835e1.pdf]

## Supporting Information

# Enhancing Near-Infrared II Photothermal Conversion through Anchoring Numerous Nanospheres to the Edge of a Gold Nanosheet

Yajie Kong,<sup>a†</sup> Qi He,<sup>b†</sup> Heng Zhang,<sup>c†</sup> Haoyu Sun,<sup>a</sup> Yi Wang,<sup>b\*</sup> Xiaohu Wu,<sup>d\*</sup> Yanyun Ma,<sup>e</sup> and Yiqun Zheng<sup>a\*</sup>

<sup>a</sup> School of Chemistry, Chemical Engineering, and Materials, Jining University, Qufu, Shandong 273155, China

<sup>b</sup> Chongqing Key Laboratory of Green Synthesis and Applications, College of Chemistry, Chongqing Normal University, Chongqing 401331, P. R. China

<sup>c</sup> School of Energy, Changzhou University, Changzhou, Jiangsu 213164, China

<sup>d</sup> Thermal Science Research Center, Shandong Institute of Advanced Technology, Jinan, Shandong 250100, China

<sup>e</sup> Institute of Functional Nano&Soft Materials (FUNSOM), Jiangsu Key Laboratory of Advanced Negative Carbon Technologies, Soochow University, Suzhou, Jiangsu 215123, China

† These authors contribute equally to this work.

\*Corresponding author: Prof. Dr. Y. Zheng, E-mail: [yzheng@jnxy.edu.cn](mailto:yzheng@jnxy.edu.cn); Prof. Y. Wang, [ywang@cqnu.edu.cn](mailto:ywang@cqnu.edu.cn); Prof. X. Wu, [xiaohu.wu@iat.cn](mailto:xiaohu.wu@iat.cn)

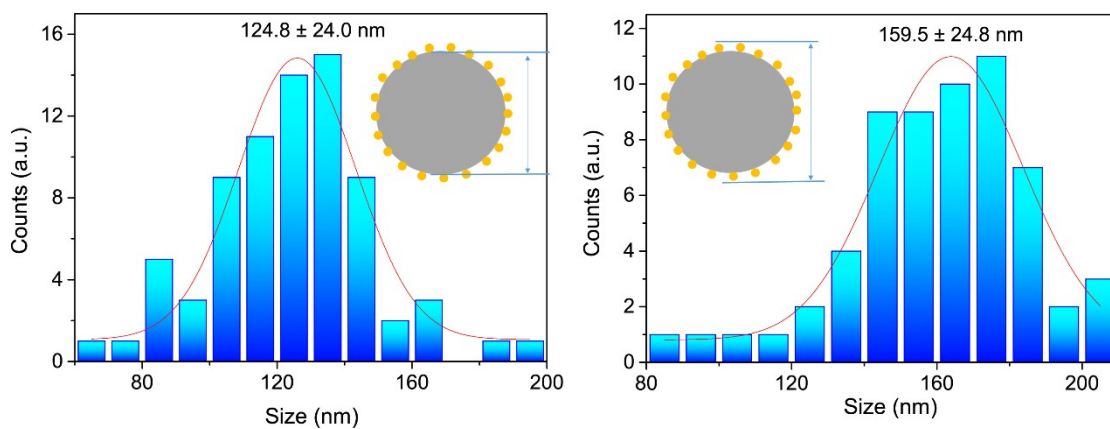

**Figure S1.** Histogram showing the size distribution of products shown in Figure 1g (Au<sub>92.7</sub>Se<sub>7.3</sub> HNSs).

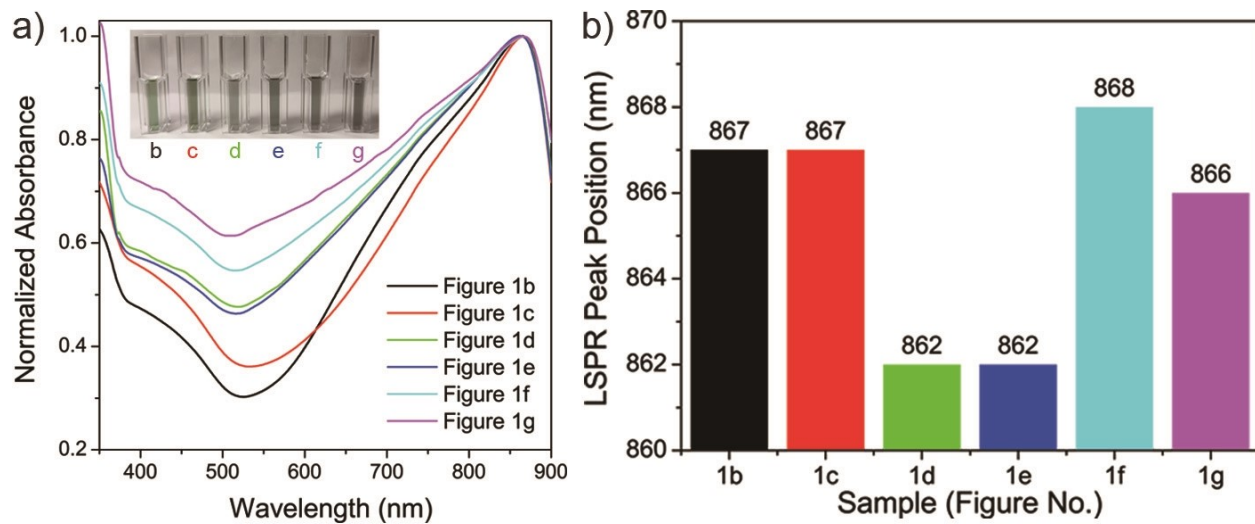

**Figure S2.** a) UV-vis extinction spectra and b) LSPR peak positions of products shown in Figure

1.

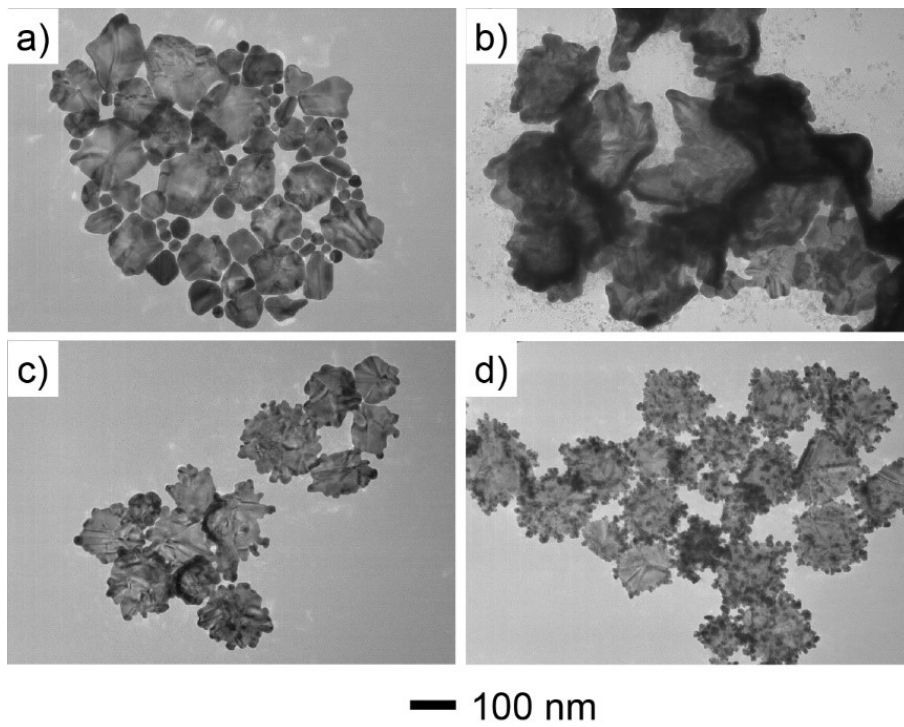

**Figure S3.** TEM images of products obtained via the standard procedure, except that the amount of  $\text{SeO}_2$  was controlled to be a) 0, b) 0.1  $\mu\text{mol}$ , c) 0.2  $\mu\text{mol}$ , and d) 2  $\mu\text{mol}$ , respectively.

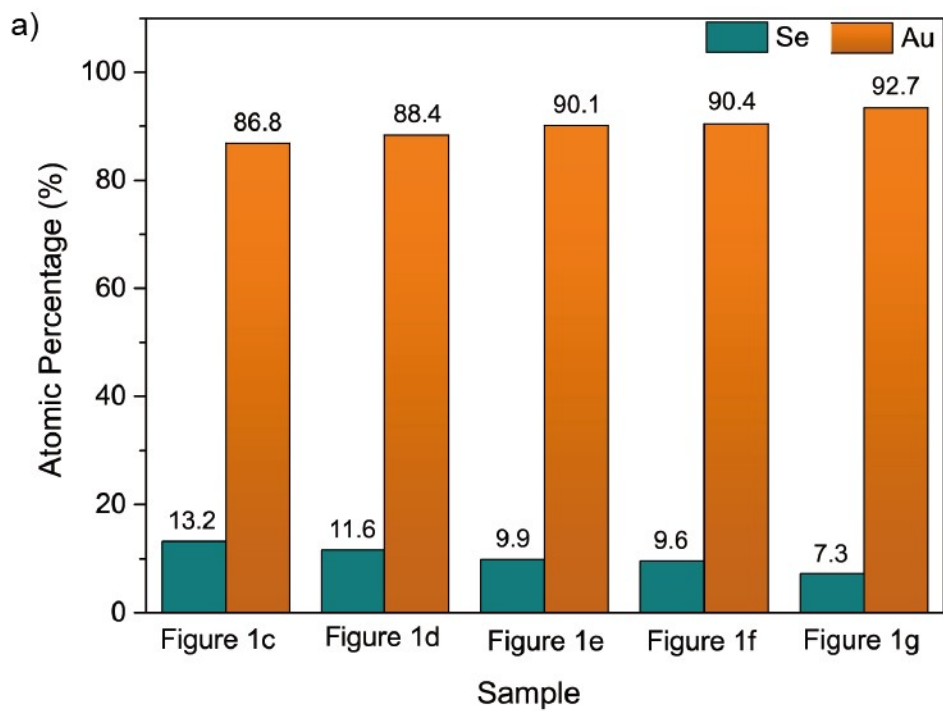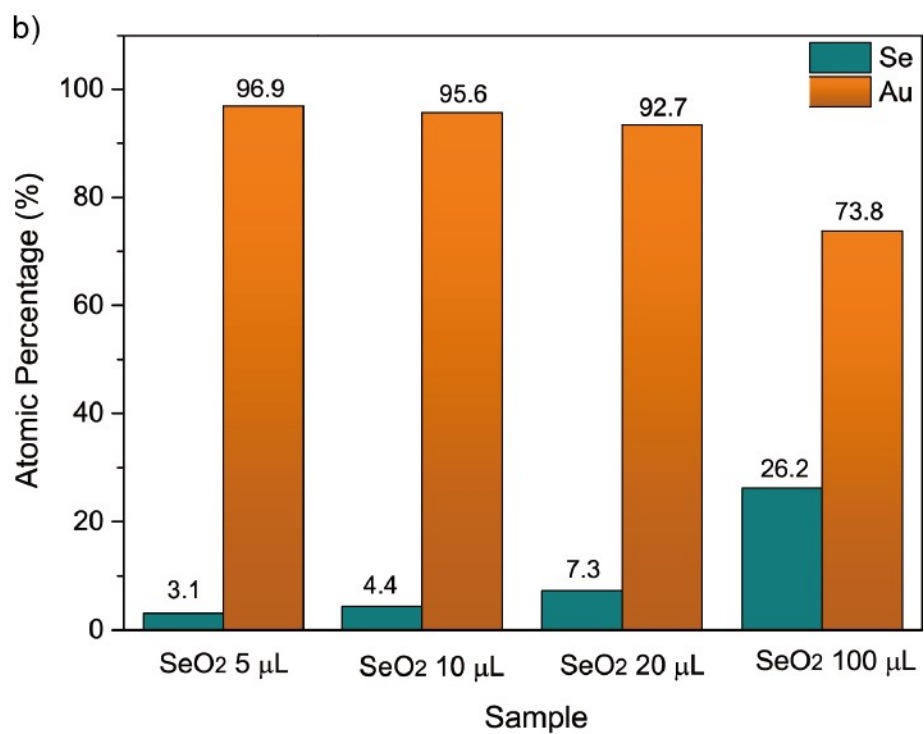

**Figure S4.** (a) Histogram showing the elemental composition in Figure 1. (b) Histogram showing the elemental composition of AuSe HNSs with different volumes of SeO<sub>2</sub> (20 mM).

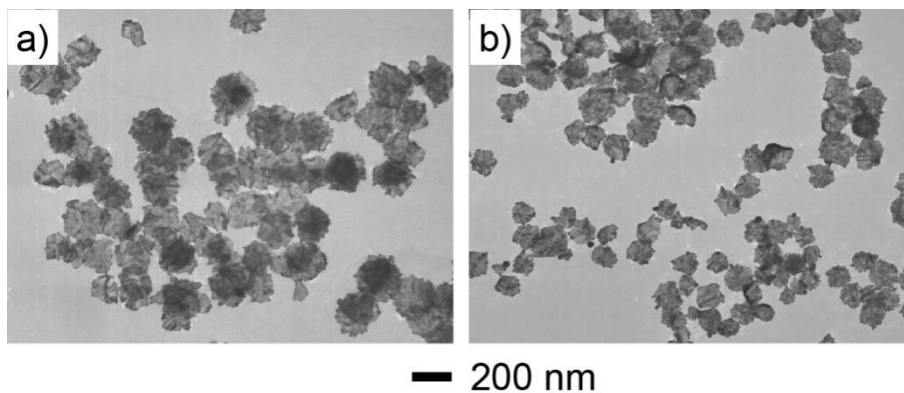

**Figure S5.** TEM images of AuSe products obtained *via* the standard procedure, except that the CTAC (200 mM, 1.5 mL) was replaced by: (a) CTAC (200 mM, 1.5 mL) + CTAB (200 mM, 0.5 mL), (b) CTAB (200 mM, 0.5 mL) + H<sub>2</sub>O 1.5 mL.

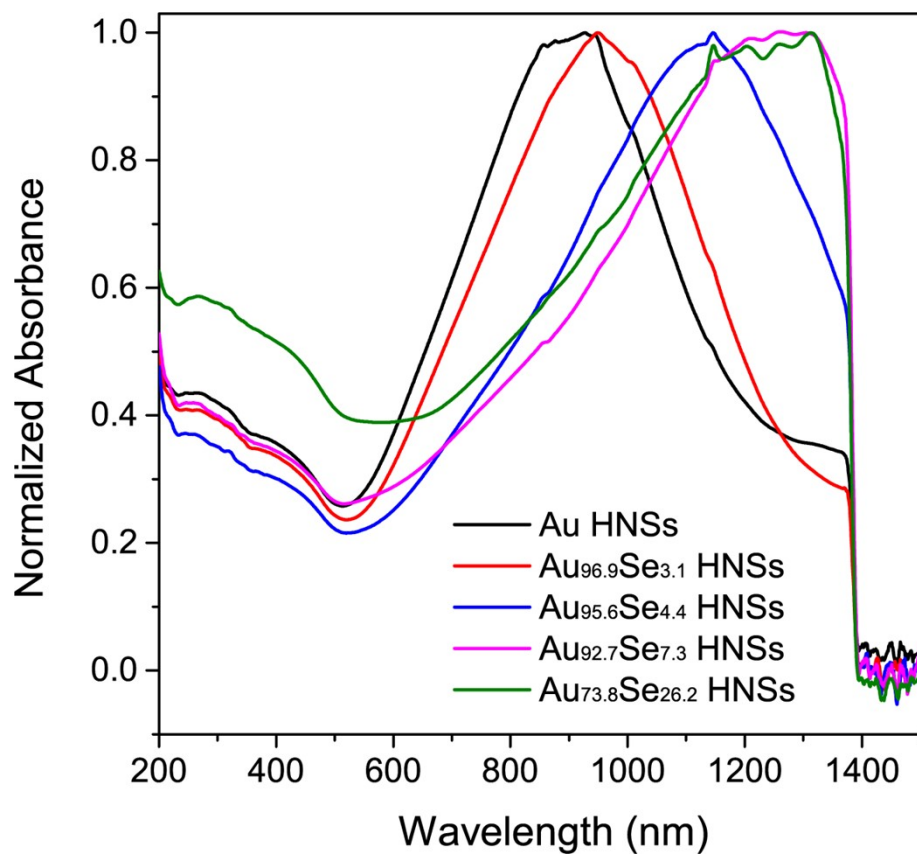

**Figure S6.** UV-vis-NIR absorption of products shown in Figure 4a.

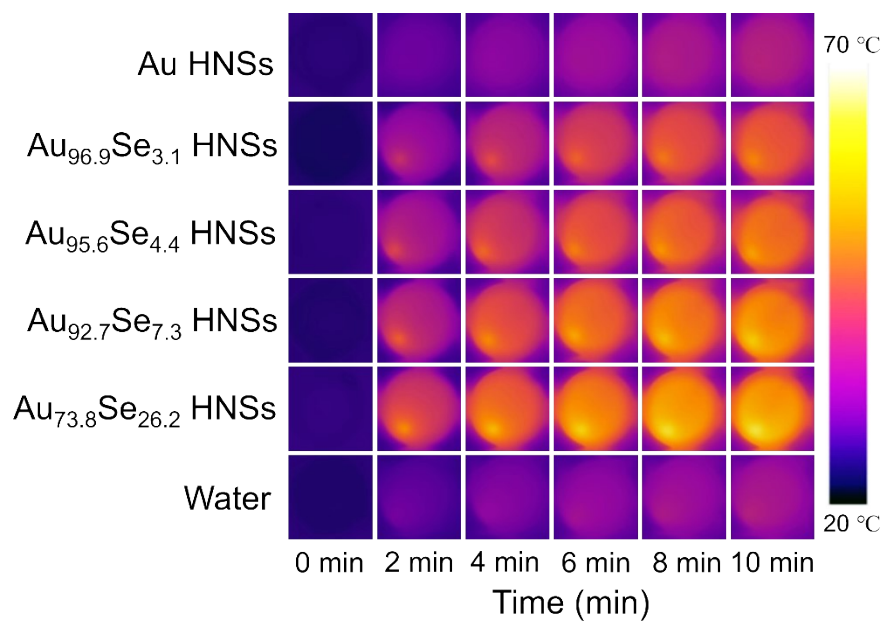

**Figure S7.** Photothermal images of five Au-based nanosheets upon irradiation.



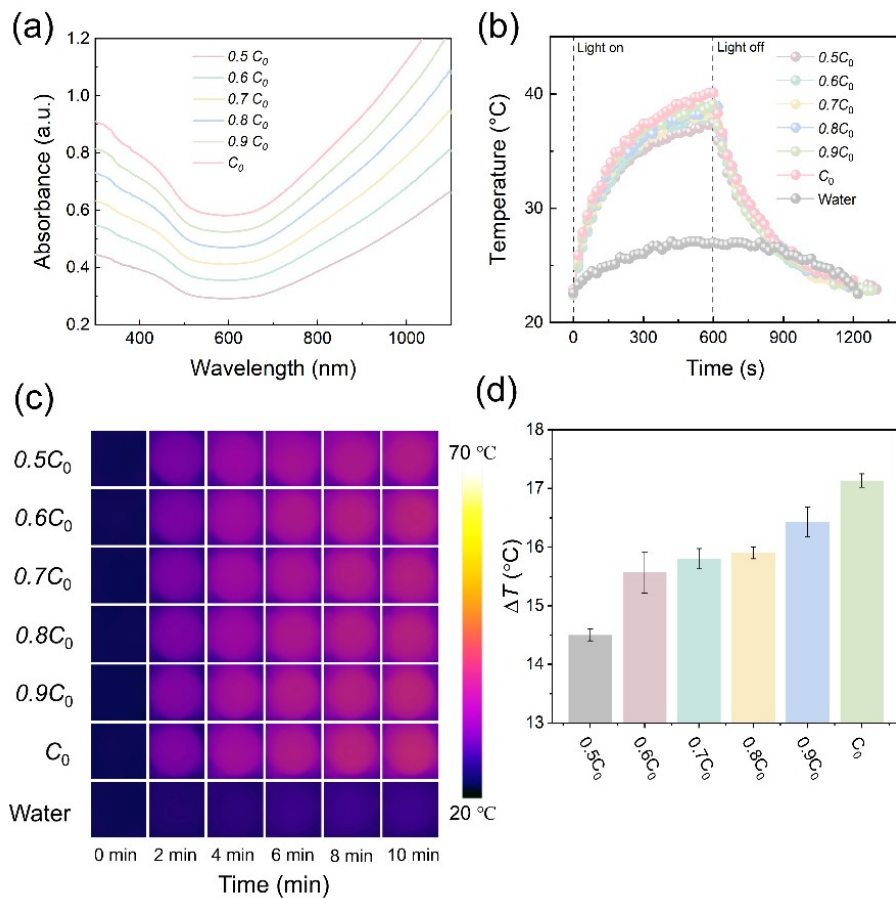

**Figure S8.** Photothermal conversion performances of Au<sub>73.8</sub>Se<sub>26.2</sub> HNSs at different particle concentrations: (a) UV-Vis-NIR absorption spectra; (b)  $\Delta T$ - $t$  curves collected with a 1064 nm laser on/off (1 W cm<sup>-2</sup>); (c) corresponding thermal images; (d) Histogram of  $\Delta T$ .

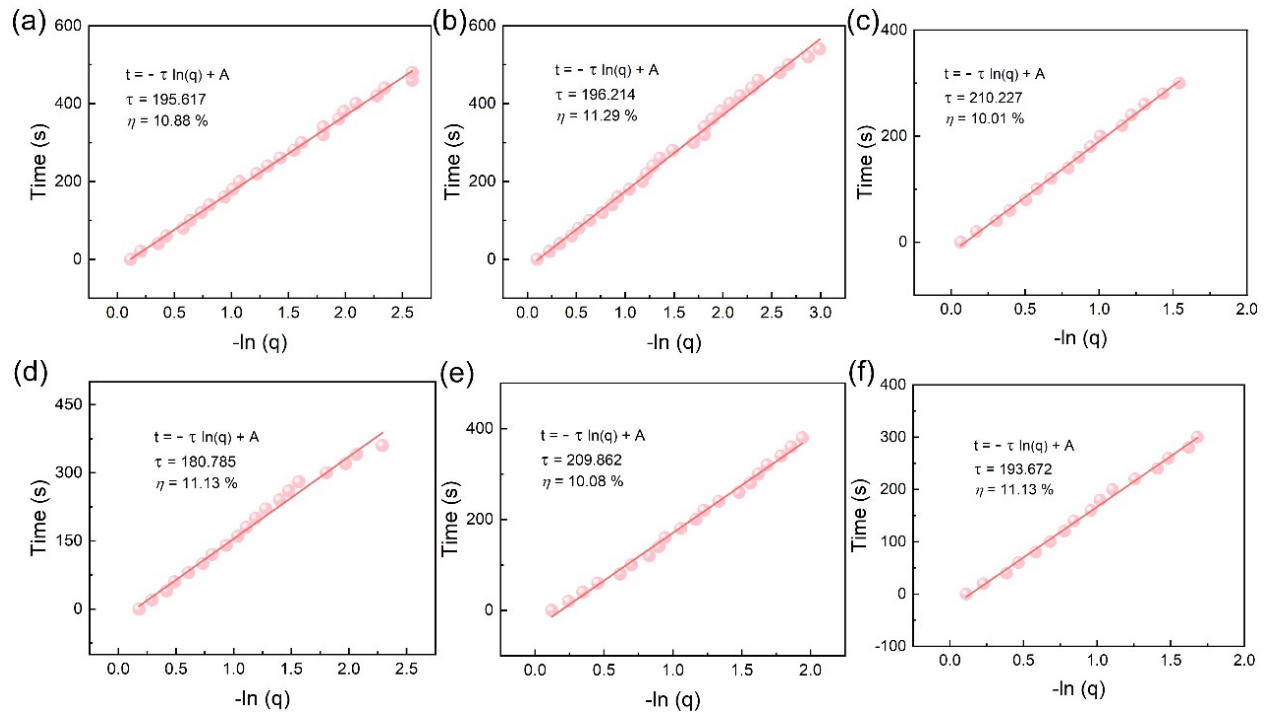

**Figure S9.** Linear fitting plot of  $\ln(q)$ -time during the cooling period.  $C =$  (a)  $0.5C_0$  (b)  $0.6C_0$  (c)  $0.7C_0$  (d)  $0.8C_0$  (e)  $0.9C_0$  and (f)  $C_0$ .

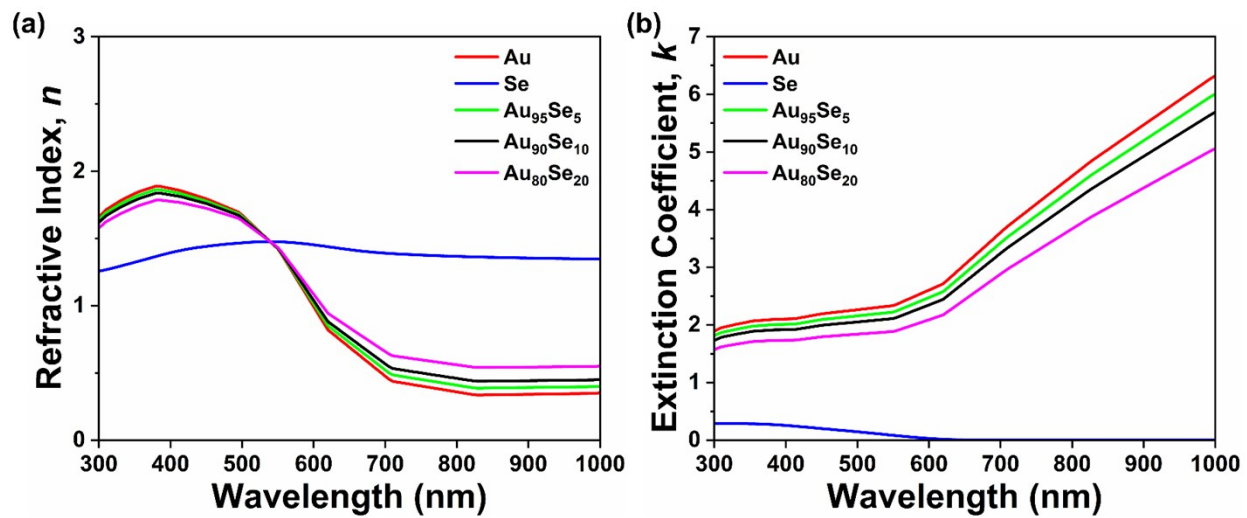

**Figure S10.** Optical parameters of the materials. (a) Refractive index and (b) Extinction coefficient.

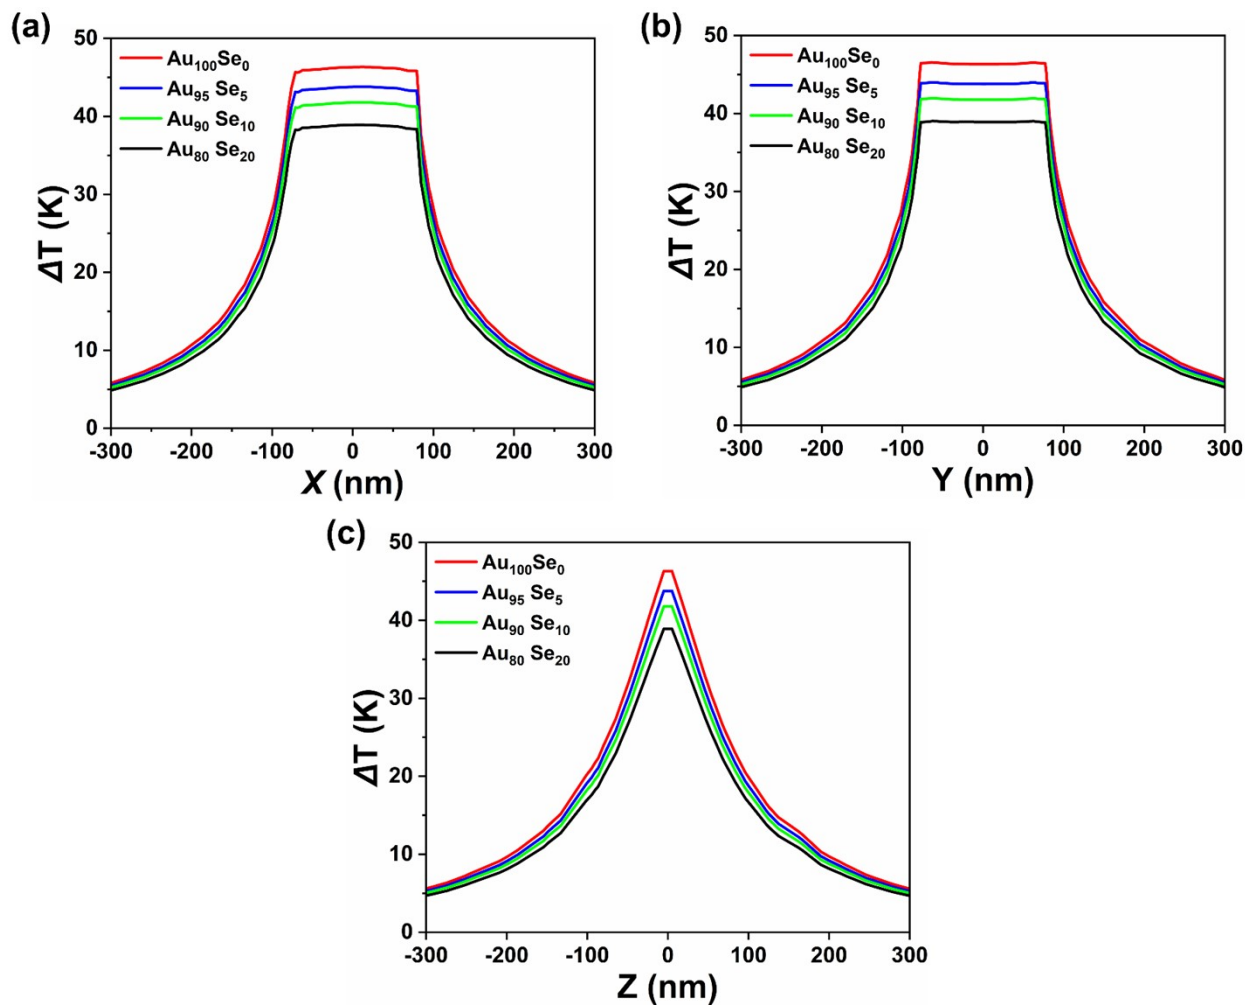

**Figure S11.** Temperature distributions of nanoparticles with different Au-Se ratios. (a)  $x$ -axis, (b)  $y$ -axis, (c)  $z$ -axis.

**Table S1.** Real-time temperatures of the water and product solutions as monitored by the thermal imaging camera.

| Time (s) | T <sub>H<sub>2</sub>O</sub> (°C) | ΔT <sub>H<sub>2</sub>O</sub> | T <sub>product</sub> (°C) | ΔT <sub>product</sub> | ΔT/ΔT <sub>max</sub> | -ln(ΔT/ΔT <sub>max</sub> ) |
|----------|----------------------------------|------------------------------|---------------------------|-----------------------|----------------------|----------------------------|
| 0        | 24.7                             | 0                            | 25.7                      | 0                     | 0                    | /                          |
| 20       | 26.2                             | 1.5                          | 32.3                      | 6.6                   | 0.2260274            | 1.48709906                 |
| 40       | 27.3                             | 2.6                          | 34.9                      | 9.2                   | 0.3150685            | 1.154965225                |
| 60       | 28.3                             | 3.6                          | 37.3                      | 11.6                  | 0.3972603            | 0.923163611                |
| 80       | 28.7                             | 4                            | 39.5                      | 13.8                  | 0.4726027            | 0.749500117                |
| 100      | 29.2                             | 4.5                          | 41.1                      | 15.4                  | 0.5273973            | 0.6398012                  |
| 120      | 29.7                             | 5                            | 42.3                      | 16.6                  | 0.5684932            | 0.564766014                |
| 140      | 29.9                             | 5.2                          | 43.8                      | 18.1                  | 0.619863             | 0.478256771                |
| 160      | 30.4                             | 5.7                          | 44.4                      | 18.7                  | 0.640411             | 0.445645185                |
| 180      | 31.1                             | 6.4                          | 45.6                      | 19.9                  | 0.6815068            | 0.383448978                |
| 200      | 31.8                             | 7.1                          | 46                        | 20.3                  | 0.6952055            | 0.363547823                |
| 220      | 32                               | 7.3                          | 46.9                      | 21.2                  | 0.7260274            | 0.320167528                |
| 240      | 32.5                             | 7.8                          | 47.3                      | 21.6                  | 0.739726             | 0.301475395                |
| 260      | 32.7                             | 8                            | 48.4                      | 22.7                  | 0.7773973            | 0.251803785                |
| 280      | 33.2                             | 8.5                          | 48.8                      | 23.1                  | 0.7910959            | 0.234336092                |
| 300      | 33.3                             | 8.6                          | 49.4                      | 23.7                  | 0.8116438            | 0.208693661                |
| 320      | 33.6                             | 8.9                          | 49.7                      | 24                    | 0.8219178            | 0.196114879                |
| 340      | 34.2                             | 9.5                          | 50.2                      | 24.5                  | 0.8390411            | 0.175495592                |
| 360      | 34.6                             | 9.9                          | 50.6                      | 24.9                  | 0.8527397            | 0.159300906                |
| 380      | 34.8                             | 10.1                         | 51.4                      | 25.7                  | 0.880137             | 0.127677717                |
| 400      | 34.9                             | 10.2                         | 51.3                      | 25.6                  | 0.8767123            | 0.131576358                |
| 420      | 35.2                             | 10.5                         | 51.9                      | 26.2                  | 0.8972603            | 0.108409299                |
| 440      | 35.4                             | 10.7                         | 52.3                      | 26.6                  | 0.9109589            | 0.093257493                |
| 460      | 35.5                             | 10.8                         | 52                        | 26.3                  | 0.9006849            | 0.10459977                 |
| 480      | 35.7                             | 11                           | 52.5                      | 26.8                  | 0.9178082            | 0.085766822                |
| 500      | 36                               | 11.3                         | 53.5                      | 27.8                  | 0.9520548            | 0.049132689                |
| 520      | 36.2                             | 11.5                         | 54                        | 28.3                  | 0.9691781            | 0.031306905                |

|            |             |             |             |             |           |             |
|------------|-------------|-------------|-------------|-------------|-----------|-------------|
| 540        | 36.4        | 11.7        | 54.3        | 28.6        | 0.9794521 | 0.020761991 |
| 560        | 36.6        | 11.9        | 54.7        | 29          | 0.9931507 | 0.006872879 |
| 580        | 36.8        | 12.1        | 54.7        | 29          | 0.9931507 | 0.006872879 |
| <b>600</b> | <b>37.1</b> | <b>12.4</b> | <b>54.9</b> | <b>29.2</b> | <b>1</b>  | <b>0</b>    |
| 620        |             |             | 50.5        | 24.8        | 0.8493151 | 0.163325056 |
| 640        |             |             | 48.4        | 22.7        | 0.7773973 | 0.251803785 |
| 660        |             |             | 47          | 21.3        | 0.7294521 | 0.315461637 |
| 680        |             |             | 45.6        | 19.9        | 0.6815068 | 0.383448978 |
| 700        |             |             | 44.7        | 19          | 0.6506849 | 0.42972973  |
| 720        |             |             | 43.6        | 17.9        | 0.6130137 | 0.489367996 |
| 740        |             |             | 42.9        | 17.2        | 0.5890411 | 0.529259325 |
| 760        |             |             | 41.7        | 16          | 0.5479452 | 0.601579987 |
| 780        |             |             | 40.8        | 15.1        | 0.5171233 | 0.659473965 |
| 800        |             |             | 40.3        | 14.6        | 0.5       | 0.693147181 |
| 820        |             |             | 39.6        | 13.9        | 0.4760274 | 0.742279869 |
| 840        |             |             | 39          | 13.3        | 0.4554795 | 0.786404674 |
| 860        |             |             | 38.2        | 12.5        | 0.4280822 | 0.848440065 |
| 880        |             |             | 37.5        | 11.8        | 0.4041096 | 0.906069178 |
| 900        |             |             | 36.9        | 11.2        | 0.3835616 | 0.958254931 |
| 920        |             |             | 36.2        | 10.5        | 0.359589  | 1.022793452 |
| 940        |             |             | 35.5        | 9.8         | 0.3356164 | 1.091786324 |
| 960        |             |             | 35.1        | 9.4         | 0.3219178 | 1.13345902  |
| 980        |             |             | 34.6        | 8.9         | 0.3047945 | 1.188117433 |
| 1000       |             |             | 34.2        | 8.5         | 0.2910959 | 1.234102546 |
| 1020       |             |             | 33.7        | 8           | 0.2739726 | 1.294727168 |
| 1040       |             |             | 33.4        | 7.7         | 0.2636986 | 1.33294838  |
| 1060       |             |             | 32.8        | 7.1         | 0.2431507 | 1.414073925 |
| 1080       |             |             | 32.5        | 6.8         | 0.2328767 | 1.457246097 |
| 1100       |             |             | 32.6        | 6.9         | 0.2363014 | 1.442647298 |
| 1120       |             |             | 31.7        | 6           | 0.2054795 | 1.58240924  |
| 1140       |             |             | 31.5        | 5.8         | 0.1986301 | 1.616310792 |

|      |      |     |           |             |
|------|------|-----|-----------|-------------|
| 1160 | 30.8 | 5.1 | 0.1746575 | 1.74492817  |
| 1180 | 30.5 | 4.8 | 0.1643836 | 1.805552791 |
| 1200 | 30.3 | 4.6 | 0.1575342 | 1.848112406 |
| 1220 | 30.3 | 4.6 | 0.1575342 | 1.848112406 |
| 1240 | 29.8 | 4.1 | 0.140411  | 1.963181736 |
| 1260 | 29.6 | 3.9 | 0.1335616 | 2.013192156 |
| 1280 | 29.5 | 3.8 | 0.130137  | 2.039167643 |
| 1300 | 29.3 | 3.6 | 0.1232877 | 2.093234864 |
| 1320 | 29   | 3.3 | 0.1130137 | 2.180246241 |
| 1340 | 28.4 | 2.7 | 0.0924658 | 2.380916936 |
| 1360 | 28.2 | 2.5 | 0.0856164 | 2.457877977 |
| 1380 | 28   | 2.3 | 0.0787671 | 2.541259586 |
| 1400 | 28.2 | 2.5 | 0.0856164 | 2.457877977 |
| 1420 | 28   | 2.3 | 0.0787671 | 2.541259586 |
| 1440 | 27.8 | 2.1 | 0.0719178 | 2.632231365 |
| 1460 | 27.6 | 1.9 | 0.0650685 | 2.732314823 |
| 1480 | 27.4 | 1.7 | 0.0582192 | 2.843540458 |
| 1500 | 27.4 | 1.7 | 0.0582192 | 2.843540458 |
| 1520 | 27.1 | 1.4 | 0.0479452 | 3.037696473 |
| 1540 | 27   | 1.3 | 0.0445205 | 3.111804445 |
| 1560 | 26.9 | 1.2 | 0.0410959 | 3.191847152 |
| 1580 | 26.7 | 1   | 0.0342466 | 3.374168709 |
| 1600 | 26.7 | 1   | 0.0342466 | 3.374168709 |
| 1620 | 26.5 | 0.8 | 0.0273973 | 3.597312261 |
| 1640 | 26.3 | 0.6 | 0.0205479 | 3.884994333 |
| 1660 | 26.3 | 0.6 | 0.0205479 | 3.884994333 |
| 1680 | 26.2 | 0.5 | 0.0171233 | 4.06731589  |
| 1700 | 26   | 0.3 | 0.010274  | 4.578141514 |
| 1720 | 25.9 | 0.2 | 0.0068493 | 4.983606622 |

---

**Table S2.** Calculation of the resulting photothermal conversion efficiency on the basis of the initial processing of the data.

| $\tau$  | $A_{1064\text{ nm}}$ | $\Delta T_{\text{maxH}_2\text{O}}$ | $\Delta T_{\text{max product}}$ | $hA (=m \cdot C_p / \tau)$ | $\eta$ |
|---------|----------------------|------------------------------------|---------------------------------|----------------------------|--------|
| 354.758 | 0.7113               | 12.4                               | 29.2                            | 0.020126396                | 41.97% |



**Table S3.** Summary of XRD results of Au NSs, Se-doped Au NSs, and AuSe HNSs.

| <b>Sample No.</b>                         | <b>Crystal Plane</b> | <b>Two Theta (°)</b> | <b>Full width at half maxima (FWHM, °)</b> | <b>Crystalline Size* (nm)</b> |
|-------------------------------------------|----------------------|----------------------|--------------------------------------------|-------------------------------|
| Au NSs                                    | (111)                | 37.859               | 0.440                                      | 18.93                         |
| Se-doped Au NSs                           | (111)                | 37.794               | 0.653                                      | 12.75                         |
| Au <sub>92.7</sub> Se <sub>7.3</sub> HNSs | (111)                | 37.861               | 0.425                                      | 19.60                         |

\*Crystalline size was calculated using Debye-Scherrer equation.

**Table S4.** Summary of the relative peak areas (%) for each split B.E. peak and the parameters used to fit the Se 3d and Au 4f high-resolution XPS spectra.

| Orbital | B. E. Peak<br>(eV) | FWHM<br>(eV) | relative peak area | element/oxidation state |
|---------|--------------------|--------------|--------------------|-------------------------|
| Se 3d   | 54.5               | 1.99         | 32.8%              | Se(0)                   |
|         | 55.7               | 1.73         | 8.1%               | Se(II)                  |
|         | 57.4               | 4.56         | 53.9%              | Se(0)                   |
|         | 61.4               | 3.57         | 5.2%               | Se(II)                  |
| Au 4f   | 83.3               | 0.85         | 44.4%              | Au(0)                   |
|         | 84.7               | 1.48         | 9.9%               | Au(I)                   |
|         | 87.5               | 0.86         | 42.4%              | Au(0)                   |
|         | 88.4               | 1.58         | 3.3%               | Au(I)                   |
